# Supplementary material
Source: PubMed Central journal article supplement (PMC4079767)

**A**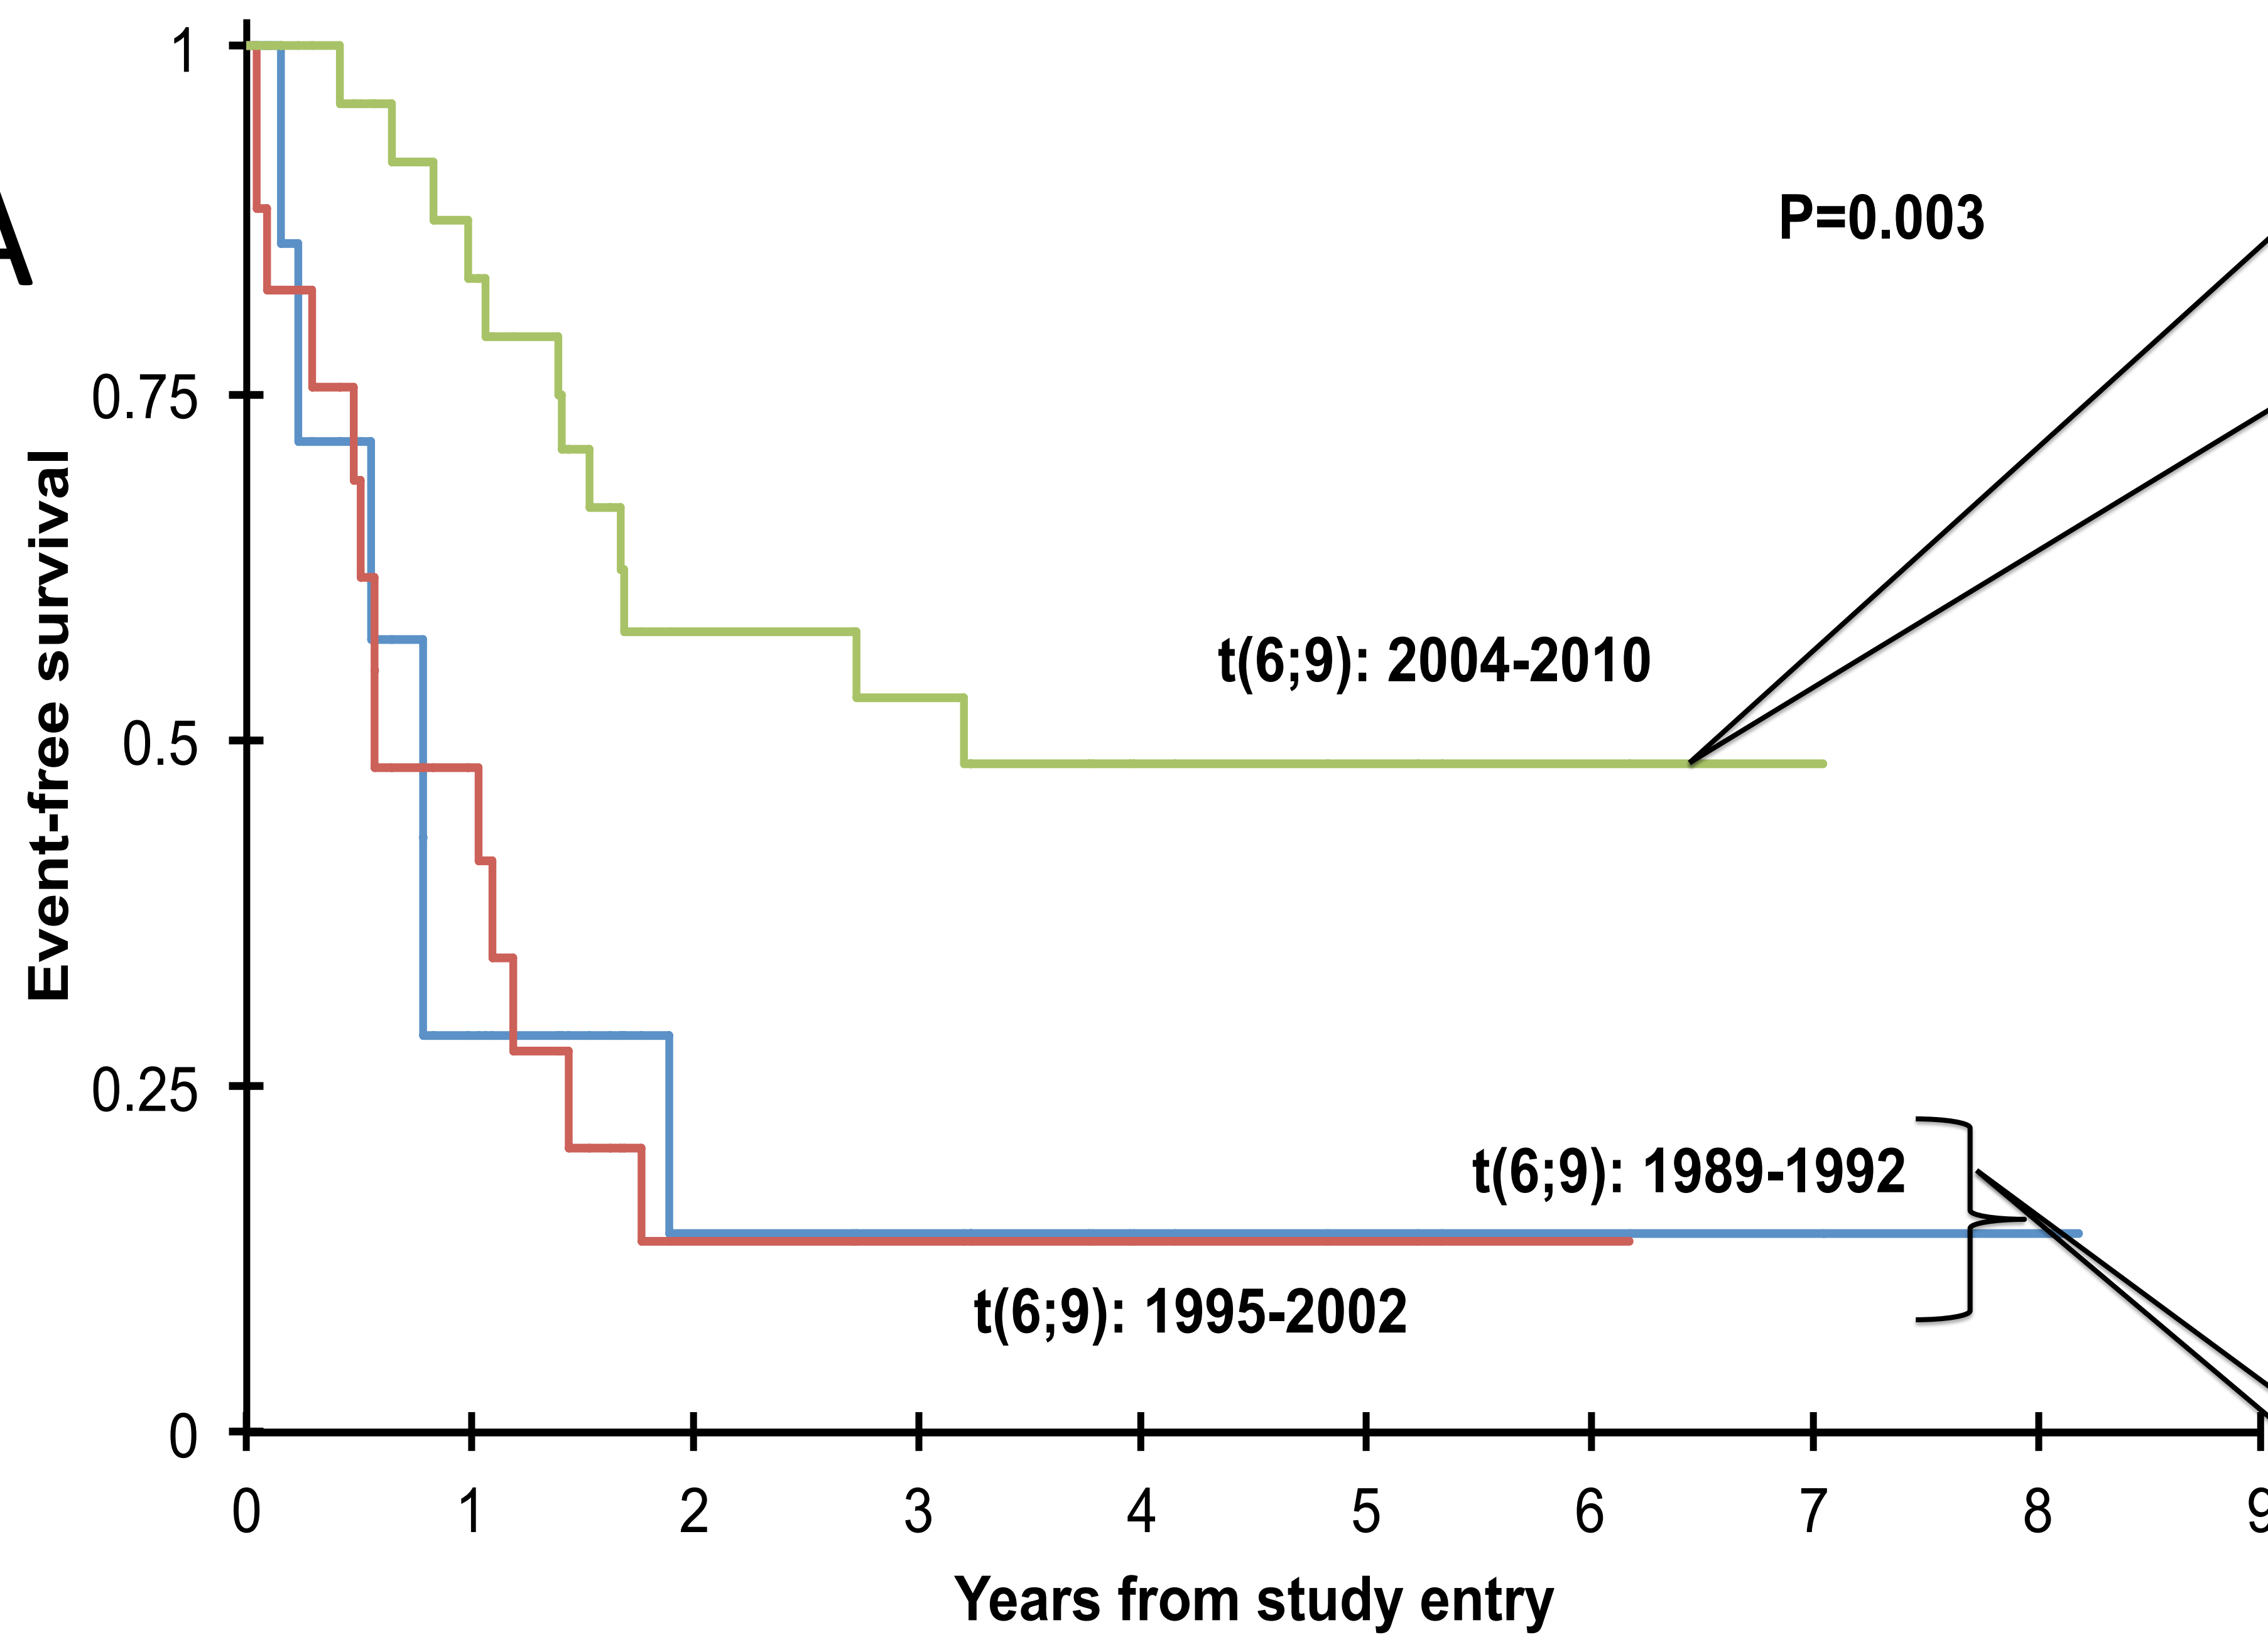**B**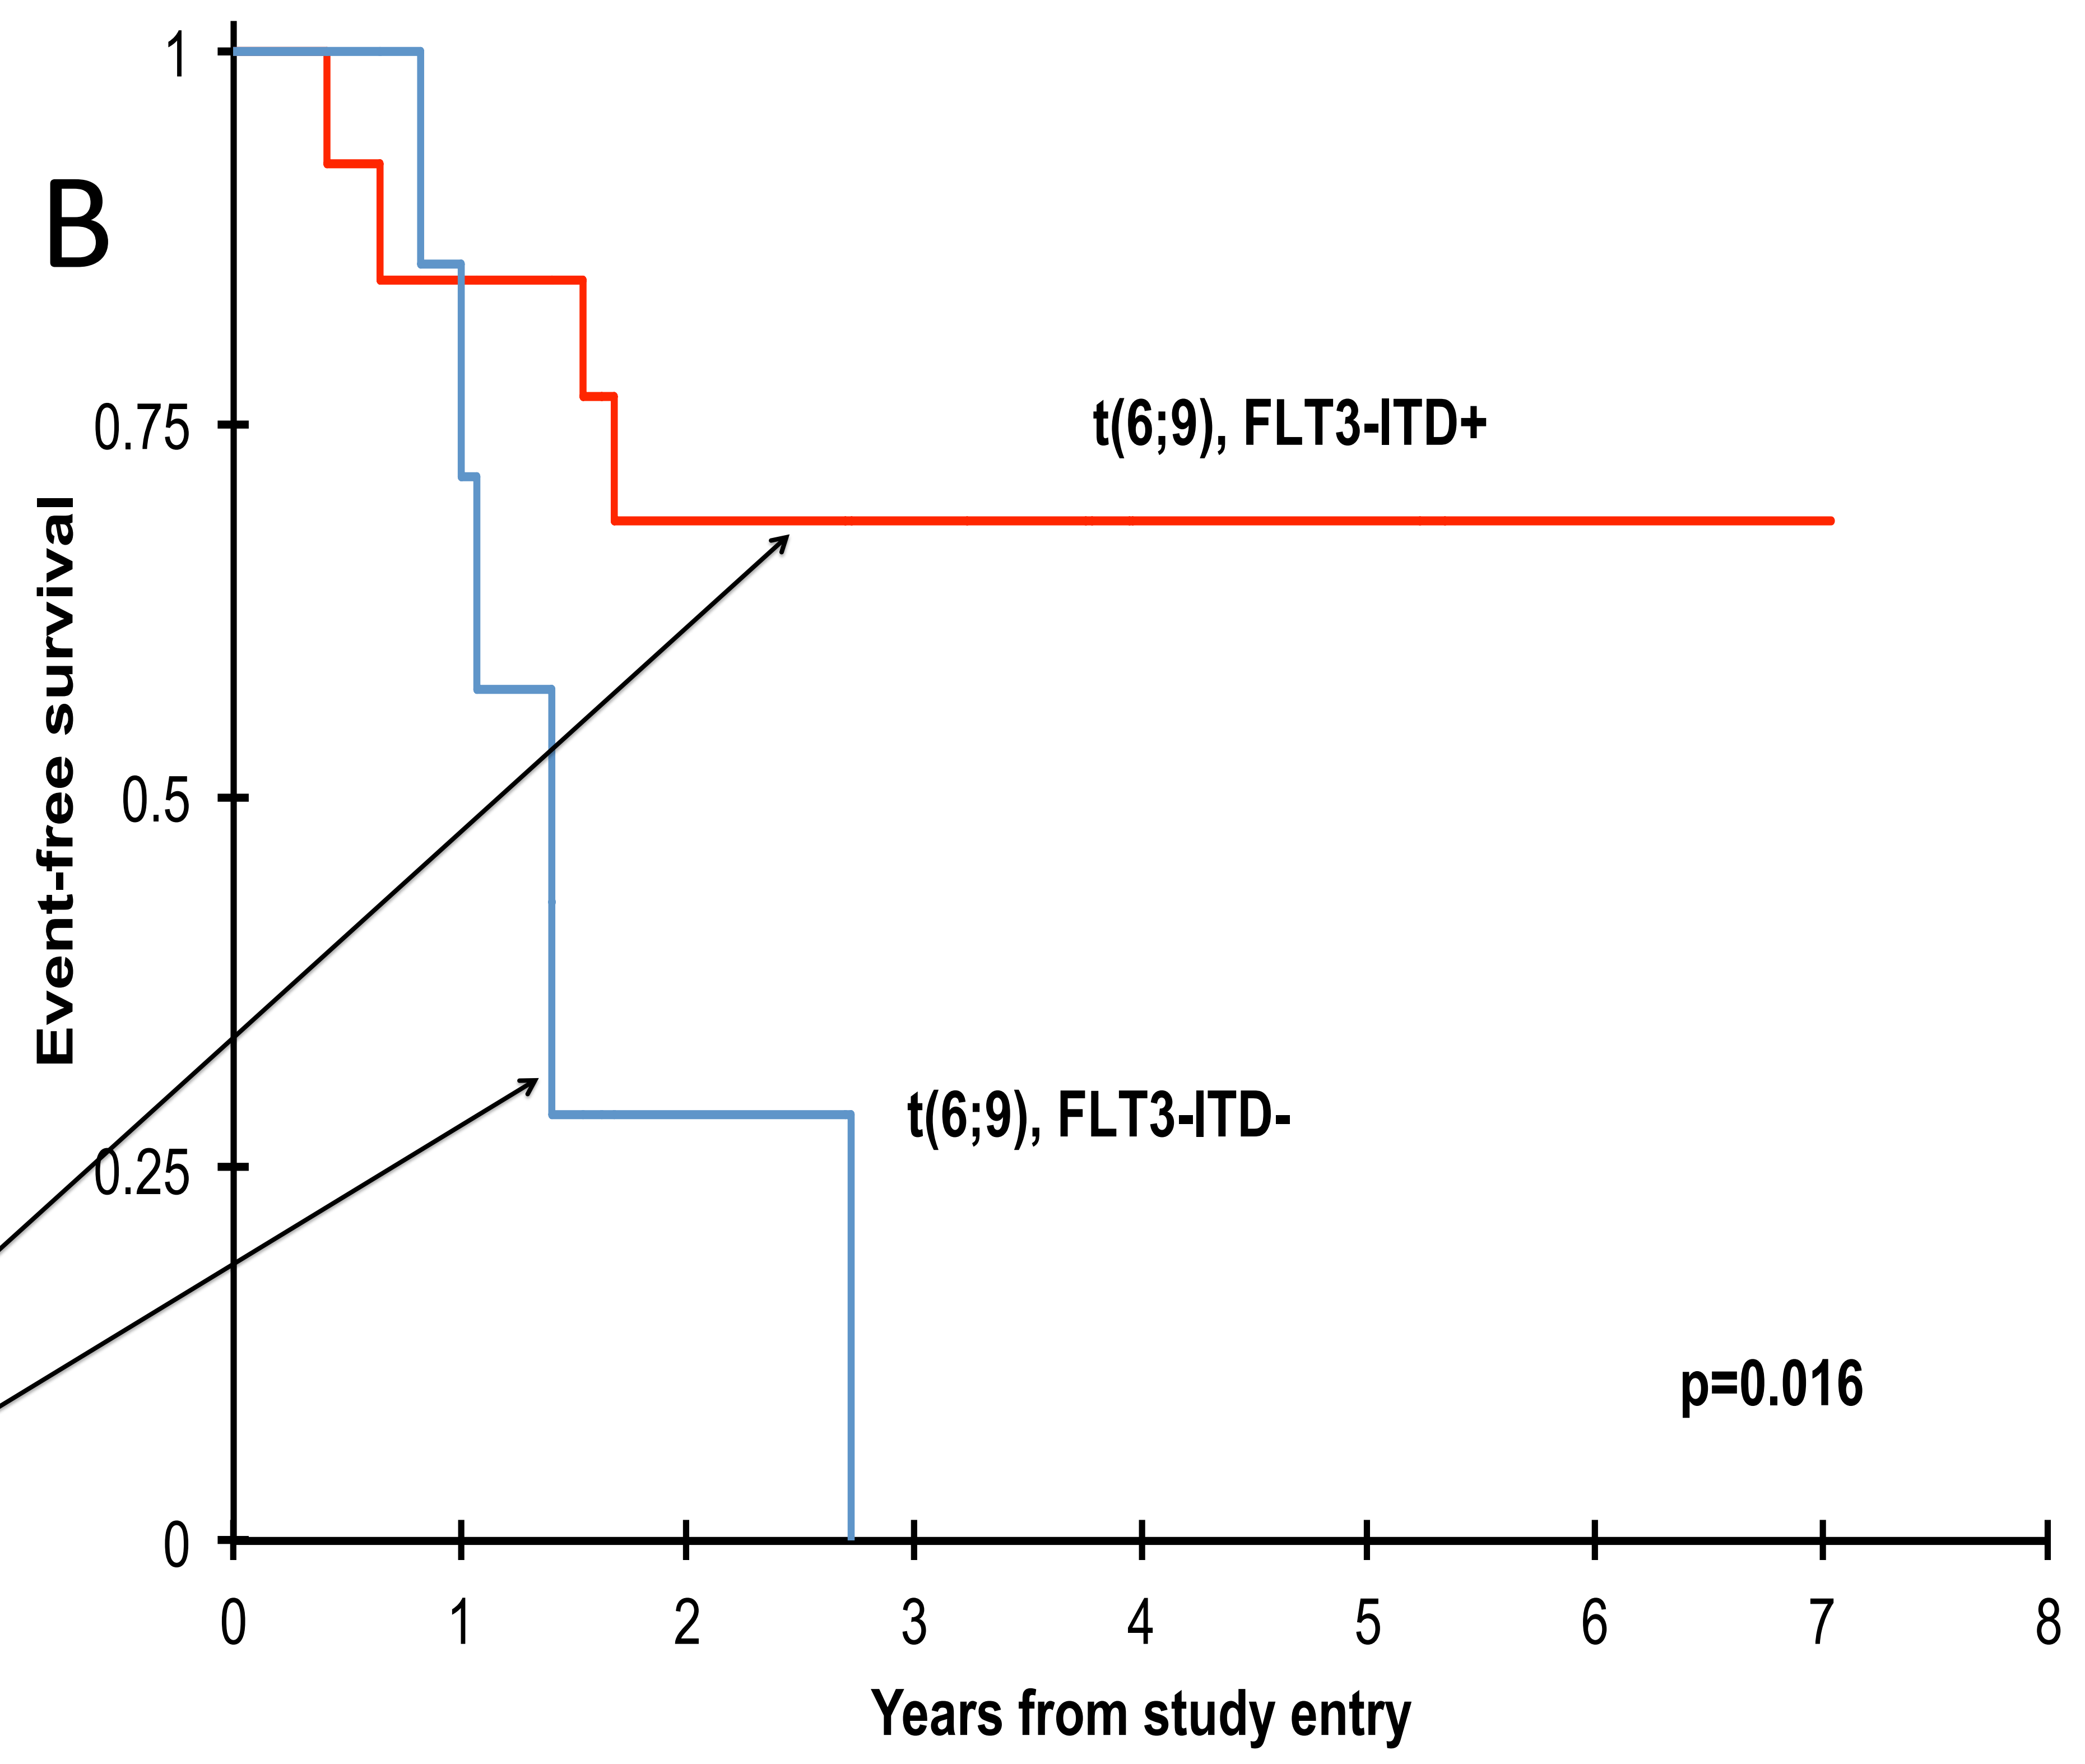**C**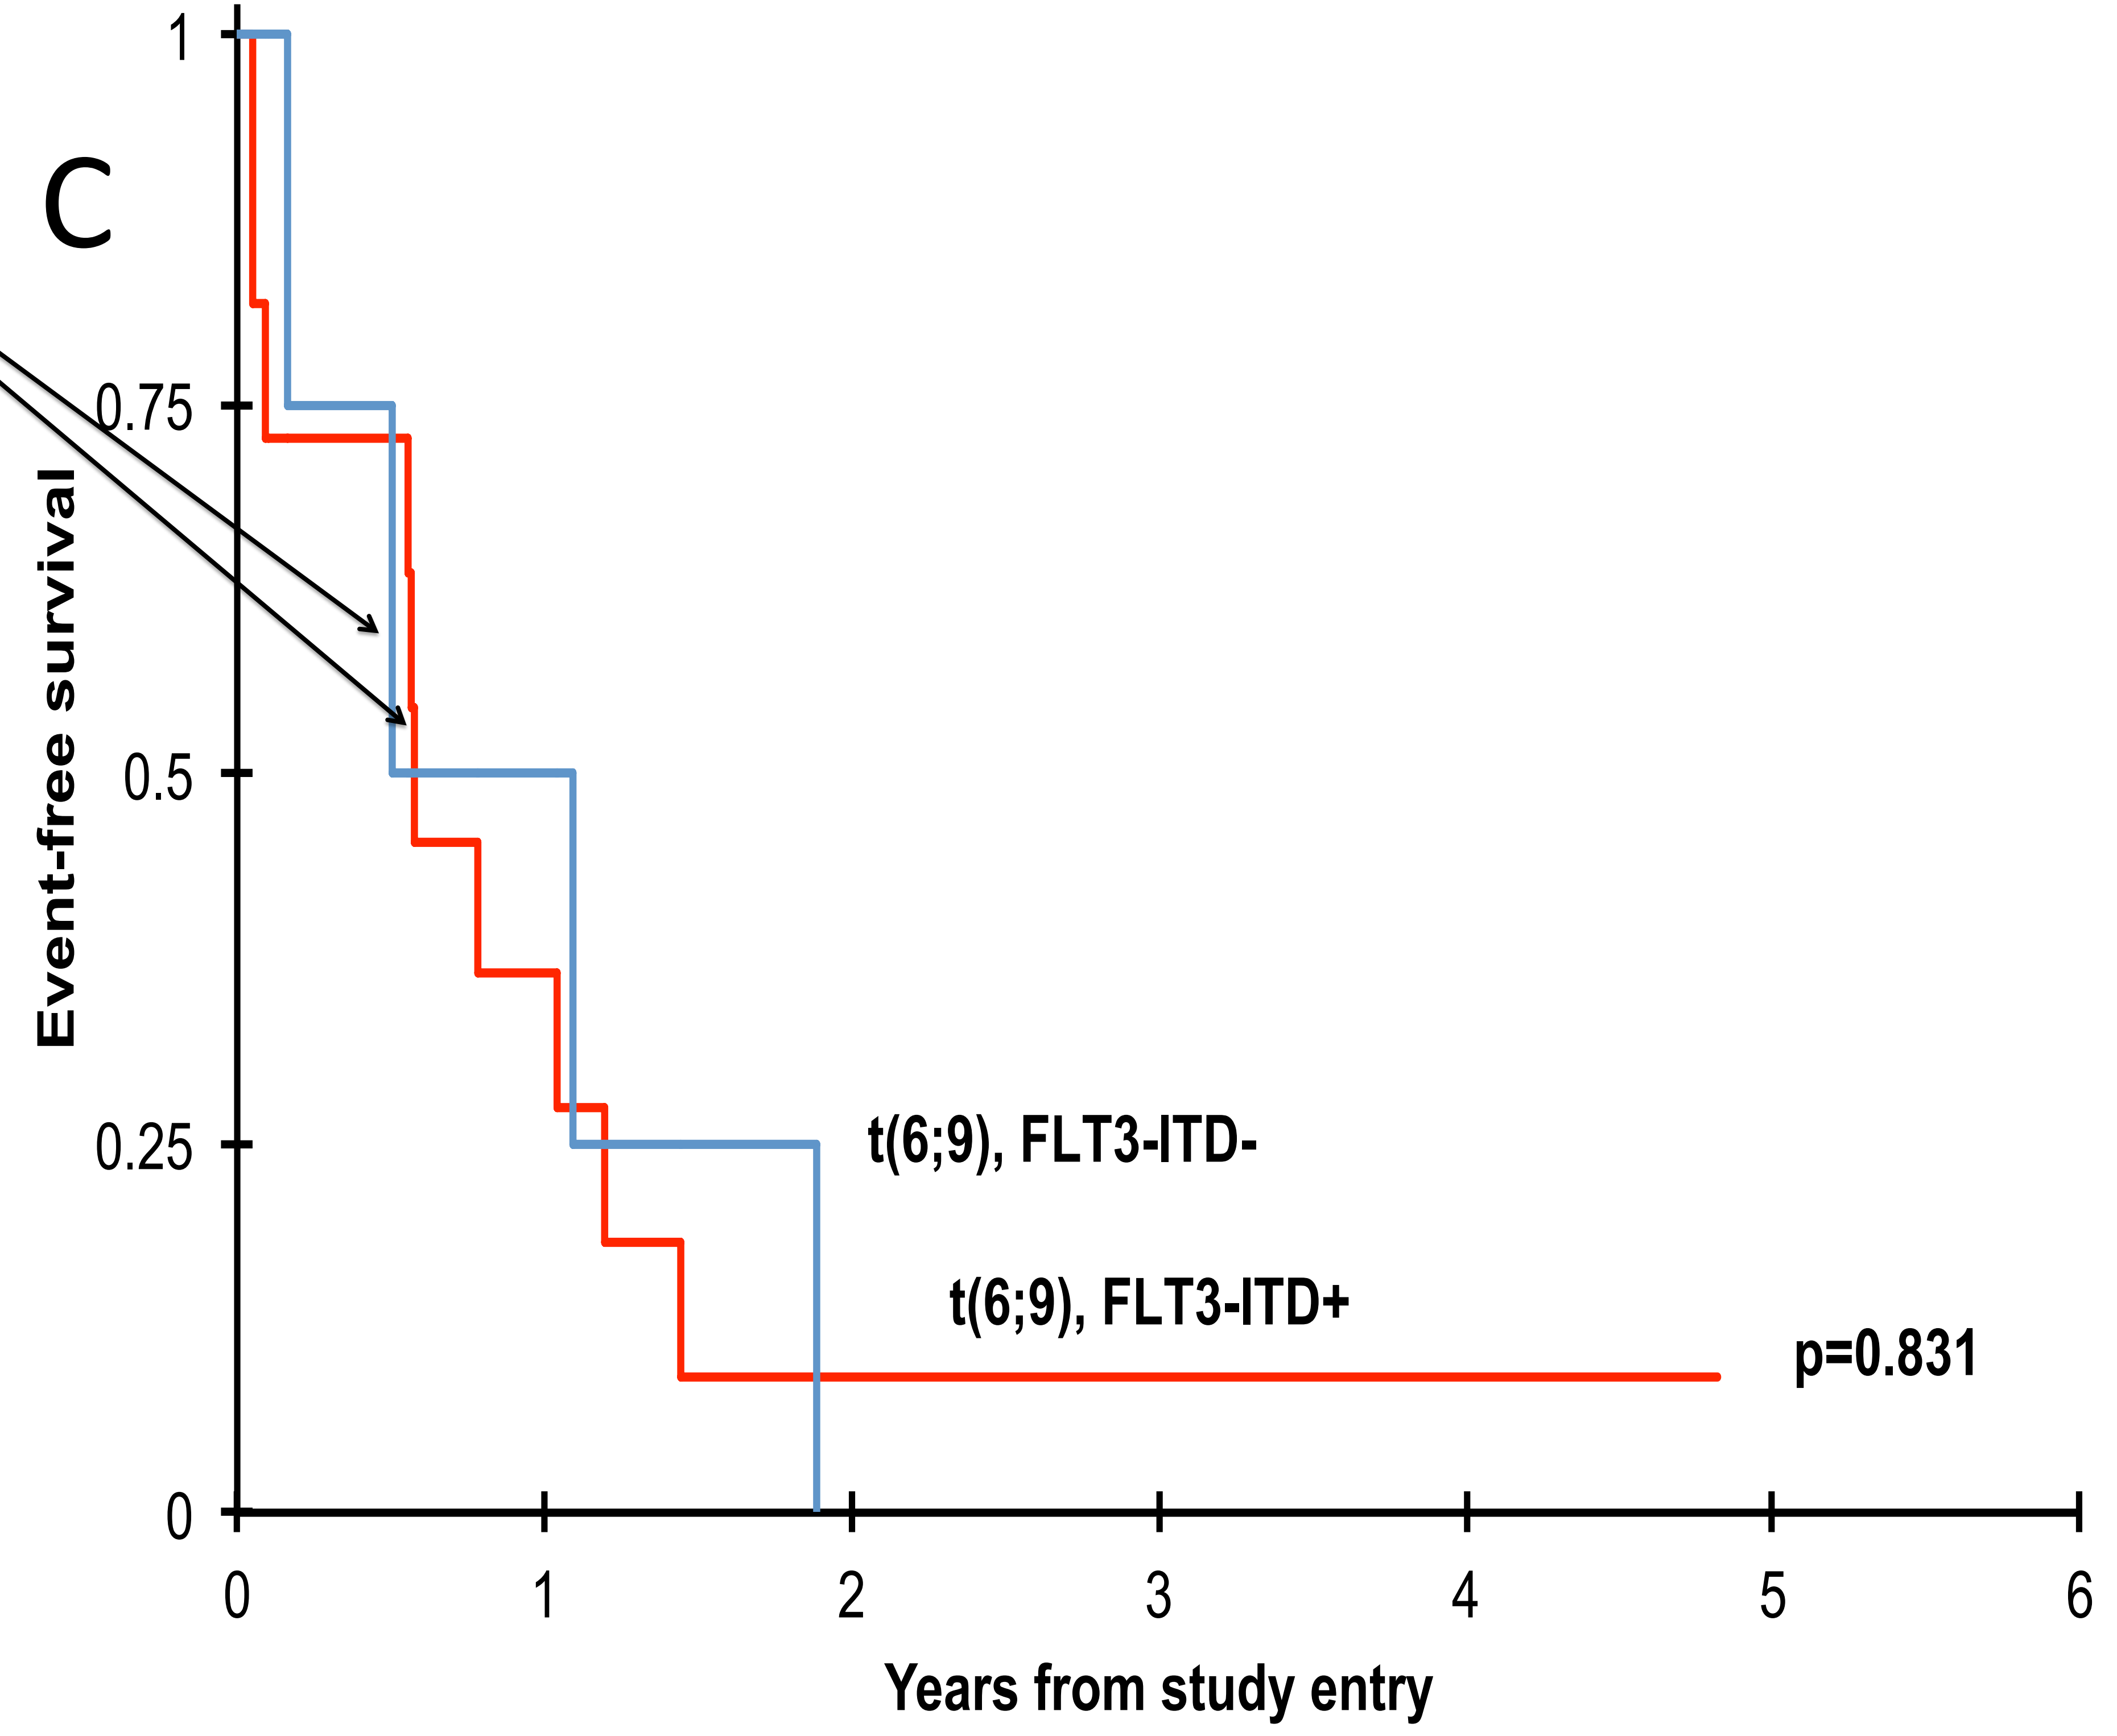

Supplement: NIHMS573614-supplement-Supp_Fig_S1.pdf [file NIHMS573614-supplement-Supp_Fig_S1.pdf]
